# Supplementary figures and images for: Early outcomes of the Frozenix J-graft with exclusion of the non-stent part at a single center
Source: PubMed Central journal article supplement — J Thorac Dis. 2022 Apr;14(4):1031–41. doi: 10.21037/jtd-21-1751 (PMC9096305; doi:10.21037/jtd-21-1751), 2022-04

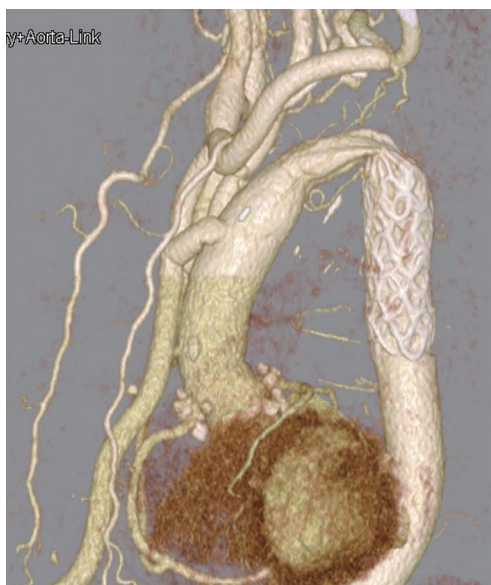

**Figure S1** Computed tomography angiography image of kinking of the Frozenix J-graft.

Supplement: jtd-14-04-1031-supplementary.pdf [file jtd-14-04-1031-supplementary.pdf]
